# Supplementary material
Source: Springer Nature journal article supplement (https://www.springermedizin.de/resource/supplementary/12936_2014_3166_MOESM6_ESM.pdf/9545264)

**A) Day 5, 48 h after the first dose**

Vehicle

UK-112,214  
(100 mg/kg)UK-112,214  
(300 mg/kg)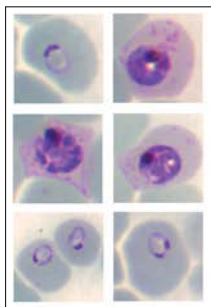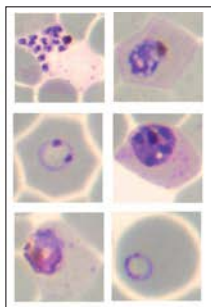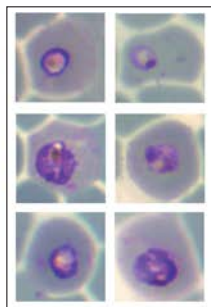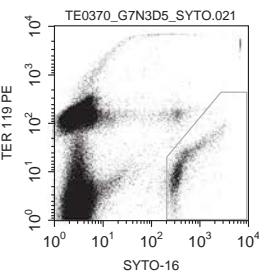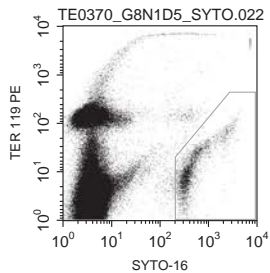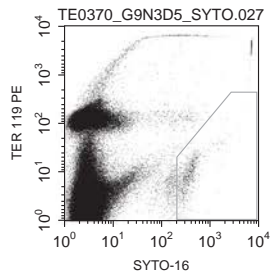**B) Day 7, 96 h after the first dose**

Vehicle

UK-112,214  
(100 mg/kg)UK-112,214  
(300 mg/kg)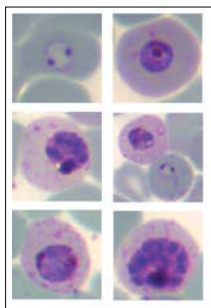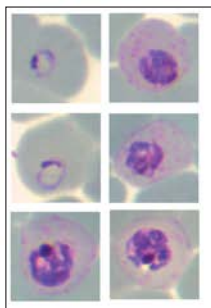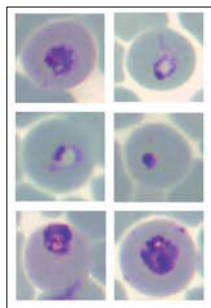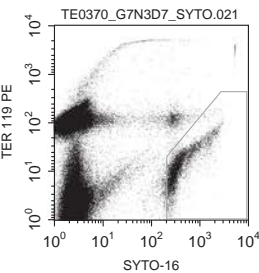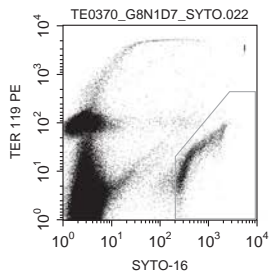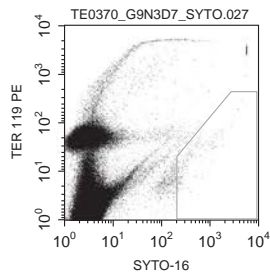

Supplement: MOESM6 [file 9545264]
